# Supplementary material for: Identification and Expression Analysis of the FAD Gene Family in Anoplophora glabripennis (Coleoptera: Cerambycidae) Based on Genome-Wide Data
Source: MDPI journal article supplement (doi:10.3390/f15040690), 2024-04-11
Supplement: s1 [file s1]

**File S1.** 48 FAD amino acid sequences.

**>AglaFAD1**

MTESSDELVGNMIPSAAAERNPGTTTNRILTKSNESKMDAANNQPETE EFVPRIRWPD TIAQLFLHLGCLYGF  
ILCLVSAKFYTTVFAFLSIYITGFGITAGAHRLWSHRAYKAKWPLRLLLITLFTITGQRHVYVWALDHRVHHK YSET  
DADPHNAKRGFFFSHV GWLILTPHPSVVEKRKAVDMSDLEADPIVMWQKKIYPLLFLIFNIFLPVAIPVYYWNE  
TLWNSFWINFNMRFVTVLNIAFFVNSVAHMMWGQKPYDKNISPVENLAVSLATLGEGWHNYHHVFPWDYKT  
GELGNVYNPSTTFINFFAKLGWAYDLKSVSKSMIARRAKKCGDGSHPQIWGYGDS DIEKEDLEELDKMAEEKTL  
LNKEE

**>AglaFAD2**

MTPKDMKTIVVDSESDRGRVSAAGKLPADIGTDYSFKRDIVWKNALGFLALHLAAVYGLYLCSYAHTATMLW  
MIFVALLSGEGVTGVAHRLYSHKSFKAKFSLRLALILLQTIAGQNCLYIWVRDHRQH HKFSDTDADPHNAHRGF  
FFSHV GWLMSKKHPAVIEKGKTIDMSDLEADWLVMFQKEFYKPLYAVFAIALPVAIPVHFWNETYINSFFISYML  
RNMVVLNITWLVNSAAHLYGTPFDKFIMPTSTFVG FVALGEGWHNYHHSFPWDYRAAELGSKYCLTTYVID  
FLSYFGLAYDLKSAPYTMIEKRALRTGDGTHQVYGFKKIKMGEIAEVVNEANDEKKYEVEENIIGKGGKIFPEVSQ  
RVMAVQG

**>AglaFAD3**

MAPNISTPTGVLHEYDEEVDTKDIPPEVVETSDRKLELVWKNVIIFTCFHIVAVYGLYLMFTSAKIATSIFAVIMYQL  
GGLGITAGVHRLWSHRAYKANVPLRIILTFNSIVYENSIEWARDHRVHHKFSETDADPHNAKRGFFFAHVGWL  
LCRKHPEIKNKGKDIDISDLYEDSIIVFQDRYYMIVMPLACFIPTLAPMYFWNETFVNAFCVNIFRYVFTLNATWL  
VNSAAHLYGQKPYDKYIPSEHATVSFFALGEGWHNFHHTFPWDYKSELGKYANANFSTAFINFFAKIGWATDL  
KTVSDDMVKKRVLRTGDGSHGIWGWGDKDQPKEDYNDALITHKEH

**>AglaFAD4**

MAPNISMP TGV LHEHDEEVVAKVIPPEVVKPSDRK LKLWVRNIILFAYLH AVAVYGLYLMFTSAKIATSIYAILYQL  
GGLGV TAGA HRLWAHRSYKANVPLRIILTVFNTMAFENSVIEWSRDHRVHHKFSETDADPHNAKRGFFFSHV G  
WLLCRKHPDVKNKGKGIDMSDLYEDPILAFQDRYYLILMPFACFILPTMVP MYLWNETFVNAFCINIFRYILTNA  
TWLVNSAAHLYGHKPYDRYINPAENLTVSLLALGEGWHNYHHTFPWDYKTSELGKYSVNFSAAFIDFFAKIGWA  
YDLKTVSEDMVKKRVLRTGDGTHEIWGWGDKDQPKEDYNDALITHKKY

**>AglaFAD5**

MAPNISIPTGVLHEHDEEVVAKAIPPEVVKPSDRK LKLWVRNIIFAYLHTVAVYGIYLMFACAKIATSIYAILYQLG  
SLGV TAGA HRLWSHRSYKANVPLRIILTVFNTMAYENSVIEWSRDHRVHHKFSETDADPHNAKRGFFFSHV GW  
LLCRKHPDVKNKGKGIDMSDLYEDPILAFQDRYYMILMPIACFILPTLAPMYLWNETFVNAFCINIFRYILT LHA T  
WLVNSAAHLYGHKPYDRYINPSENLTVSLLALGEGWHNYHHTFPWDYKTSELGKYSVNLSAAFIDFFANIGWAY  
DLKTVSQDMVKKRVLRTGDGTHEIWGWDDKDQPKEDYKDALITHRKS

**>AglaFAD6**

LGTILAFCGSFGVTAGAHRLWTHRSYTANVPLRVILT VFDTVAFQNSVIEWSRDHRVHHKFSETDADPHNAKRG  
FFFSHV GWLLCRKHPDVKSKGKSVDMSDLYDDPILAFQDRYYMILVFLCFIFPTLTPMYLWNETFISAFVCNIFR  
YIFALNATWLVNSAAHLYGHKPYDKYINPSENLTVSLLALGEGWHNYHHTFPWDYKTSELGKYSVNFSAAFIDFF  
AKIGWAYDLKTVSEDMIRKRVLRTGDGSHEIWGWGDKDQDKEDYNDALITHKKC

>Dmel1

MPPNAQAGAQSDSLIAAASAAADAGQSPTKLQEDSTGVLFECDEVETTDGGLVKDITVMKKA EKRLKLWVR  
NIIAFGYLHLAALYGAYLMVTS AKWQTCILAYFLYVISGLGITAGAHRLWAHRSYKAKWPLRVILVIFNTIAFQDAA  
YHWARDHRVHHKYSETDADPHNATRGFFFSHVGVLLCKKHPEVKAKGKGVDSLDRADPILMFQKKYYMIL  
MPIACFIIPTVVPMYAWGESFMNAWFVATMFRWCFILNVTWLVNSAAHKFGGRPYDKFINPENISVAILAFG  
EGWHNYHHVFPWDYKTA EFGKYSLNFTTAFIDFFAKIGWAYDLKTVSTDIIKKRVKRTGDGTHATWGWGDVD  
QPKEEIEDAVITHKKSE

>Dmel2

MPPNAQAGAQSDSLIAAASAAADAGQSPTKLQEDSTGVLFESDEVETTDGGLVKDITVMKKA EKRLKLWVR  
NIIVFGYFHLAALYGAYLMVTS AKWQTCILAYFLYVISGLGITAGAHRLWAHRSYKAKWPLRVILVIFNTIAFQDAA  
YHWARDHRVHHKYSETDADPHNATRGFFFSHVGVLLCKKHPEVKAKGKGVDSLDRADPILMFQKKYYMIL  
MPIACFIIPTVVPMYAWGESFMNAWFVATMFRWCFILNVTWLVNSAAHKFGGRPYDKFINPENISVAILAFG  
EGWHNYHHVFPWDYKTA EFGKYSLNFTTAFIDFFAKIGWAYDLKTVSTDIIKKRVKRTGDGTHATWGWGDVD  
QPKEEIEDAVITHKKSE

>Dpon1

MIHIEFIKNEPQNSATEKMTVAEIQAYPKTRLDMSAFQEKC PMEPPQEKTLEAHDNKSYSGLLPAEVGTDYSFK  
RKIVWKNAIGFFALHLAAVYGLWLMVADCYWKT DIWALLVGFSSGLGVTTGAHRLFSHKAYKAPFITRLVLILFH  
TLAQNCCLYIWVRDHRQH HKYSDTDADPHNAHRGFFFSHVGVLM SRKH PAVIAKGKTIDMSDMQADWL V  
MFQKQHYKVLYAIFAI FLPAVVPVYSWGESWWNSFFVAYMFRSVLV LNMTWLVNSAAHIWGNKPF DKYMEP  
VESSFVAFVSVGEGWHNYH HAFPWDYRAAE LGSKYSITTFVIDALAYFGLAYDLKSTPYH MVKRRVERTGDGS  
HPIFGPHA EKLESTGKLDDVDIADIVKSKEVGLVRRRLPTAQG

>Dpon3

MDFGIMKMTVAEIQAYPKTRLDMSAFQEKC PMEPPQEKTLEAHDNKSYSGLLPAEVGTDYSFKRKIVWKNAI  
GFFALHLAAVYGLWLMVADCYWKT DIWALLVGFSSGLGVTTGAHRLFSHKAYKAPFITRLVLILFHTLAGQNCCLY  
IWVRDHRQH HKYSDTDADPHNAHRGFFFSHVGVLM SRKH PAVIAKGKTIDMSDMQADWL VMFQKQHYKV  
LYAIFAI FLPAVVPVYSWGESWWNSFFVAYMFRSVLV LNMTWLVNSAAHIWGNKPF DKYMEPVESSFVAFVSV  
GEGWHNYH HAFPWDYRAAE LGSKYSITTFVIDALAYFGLAYDLKSTPYH MVKRRVERTGDGSHPIFGPHA EKLE  
STGKLDDVDIADIVKSKEVGLVRRRLPTAQG

>Dpon2

MTVAEIQAYPKTRLDMSAFQEKC PMEPPQEKTLEAHDNKSYSGLLPAEVGTDYSFKRKIVWKNAIGFFALHLAA  
VYGLWLMVADCYWKT DIWALLVGFSSGLGVTTGAHRLFSHKAYKAPFITRLVLILFHTLAGQNCCLYIWVRDHRQ  
HHKYSDTDADPHNAHRGFFFSHVGVLM SRKH PAVIAKGKTIDMSDMQADWL VMFQKQHYKVLYAIFAI FLPA  
VVPVYSWGESWWNSFFVAYMFRSVLV LNMTWLVNSAAHIWGNKPF DKYMEPVESSFVAFVSVGEGWHNY  
H HAFPWDYRAAE LGSKYSITTFVIDALAYFGLAYDLKSTPYH MVKRRVERTGDGSHPIFGPHA EKLESTGKLDDV  
DIADIVKSKEVGLVRRRLPTAQG

>Dpon4

MAPNIQSAPTGV LQEGDEEII SVVKPSRDDKPTPRKIQLVWRNIIIFAYLHAI AVYGFYLM L TSARIYTSIYAIILYQM  
GGFGV TAGAHRLW SHRAYKAKWPFRFLAF CNTLAFENS VIEWSR DHRVHHKFSETDADPHNA KRGGFFAH

MGWLLVRKHPDVIEQGKKLEISDLYADPILRFQHKYYMLLMPIICFVLPVPIPVLLWNETWLNSECLNIFRYVFTL  
HATWLVNSAAHLWGHPRYDQFINPSENIASVILALGEGWHNYHHTFPWDYKTSELGKYSVNFSTCLIDMMAKI  
GLAYDLKSSEDMIKKRVLRTGDGTHEVWGWGDKDQDPREDQKEAVITHRKL

>TniZ9

MPPQGGTGGSWVLYETDAVNTDTPVIVPPSAEKREWKIVWRNVILMGMLHIGGVYGAYLFLTKAMWLT  
DLFAFFLYLCSGLGITAGAHRLWAHKSYPKARLPLRLLTLFNTLAFQDAVIDWARDHRMHHKYSETDADPHNAT  
RGFFFSHVGVWLLVRKHPQIKAKGHTIDLSDLKSDPILRFQKKYYLTLMPLICFILPSYIPTLWGESAFNAFFVCSIFR  
YVYVNLVNTWLVNSAAHLWGSKPYDKNINPVETRPVSLVVLGEGFHNYHHTFPWDYKTAELGDYSLNFTKMFID  
FMASIGWAYDLKTVSTDVIQKRVKRTGDGSHAVWGWDDHEVHQEDKKLAAIINPEKTE

>AvelZ9

MAPNVTENGVLFESEDAATPDALGTAPVEQADDSRVYVWRNIILFAYLHLAAIYGGYLFLESAKWQTDIFAYFL  
YVASGLGITAGAHRLWAHKSYPKAKWPLRVILTFTNTIAFQDSIDWARDHRMHHKYSETDADPHNATRGFFFS  
HIGWLLVRKHPELKRKGKGLDLSLYADPILRFQKKYYLLMPLACFILPTVIPVYLWNETWTNAFFVAALFRYTFI  
LNVTVLVNSAAHKWGDOPYDKSIKPSENMSVSLFAGGEGFHNYHHTFPWDYKTAELGNHRLNFTTKFINFFAK  
IGWAYDMKTVSNEIVQQRVKRTGDGSHHLWGWGDKDHAQEEINAAIRIHPKDD

>OnubZ9

MAPNIKDGADLNGVLFEEDASTPDYALATAPVQKADNYPRKLVWRNIILFAYLHLAAVYGGYLFLESAKWQTDIF  
AYILYVISGLGITAGAHRLWAHKSYPKAKWPLRLILIFNTVSFQDSALDWSRDHRMHHKYSETDADPHNATRGFF  
FSHIGWLLVRKHPELKRKGKGLDLSLYADPILRFQKKYYLLMPLGCFIMPTVVPVYFWGETWTNAFFVAALFR  
YTFILNVTWLVNSAAHKWGHKPYDSSIKPSENLSVSLFAGGEGFHNYHHTFPWDYKTAELGNHRLNFTTKFINF  
FAKIGWAYDLKTVSDEIQRVKRTGDGSHHLWGWGDKDQPKKEVNAAIRINPKDE

>PocZ9

MAPNVTENGVLFESEDAVTPDLAMARAPVQQADSTPRVYVWRNIILFAYLHLAAVYGFYLLVSAKWQTDIFA  
YLLYVASGLGITAGAHRLWAHKSYPKAKWPLRVILTFTNTIAFQDSIDWARDHRMHHKYSETDADPHNATRGFF  
FSHIGWLLVRKHPELKRKGKGLDLSLYADPILRFQKKYYLLMPLACFVLPVYVWSETWTNAFFVAALFRY  
TFILNVTWLVNSAAHKWGDOPYDKDIKPSENMSVSLFAGGEGFHNYHHTFPWDYKTAELGNHRLNFTTKFINF  
FAKLGWAYDMKTVPDITVQQRVKRTGDGSHHLWGWGDKDHAQEEINAAIRINPKDD

>HzeaZ11

MAQSYQSTTVLSEEKELTLQHLVPQASPRKYQIVYPNLITFGYWHIAGLYGLYCFTSAKWATILFSYILFVLAEGIT  
AGAHRLWAHKTAKAKLPLEILLMVFNISAFQNSAIDWVRDHRHLHKSDDADPHNASRGFFYSHVGVWLLVR  
KHPEVKKRGKELNMSDIYNNPVLRQKKYAIPIGAVCFALPTMIPVYFWGETWSNAWHITMLRYIMNLNVTF  
LVNSAAHIWGNKPYDAKILPAQNVAVSVATGGEGFHNYHVFVPWDYRAAELGNNSLNLTTKFIDLFAAIGWAY  
DLKTVSEDMIKQRIKRTGDGTDLWGHEQNCDEVWDVKDKSS

>HzeaZ9

MAPNISEDVNGVLFESEDAATPDALSTPPVQKADNRPKQLVWRNILLFAYLHLAALYGGYLFLESAKWQTDIFAYI  
LYVISGLGITAGAHRLWAHKSYPKAKWPLRVILVIFNTVAFQDAAMDWARDHRMHHKYSETDADPHNATRGFF  
FSHIGWLLVRKHPLKEKGKGLDMSDLLADPILRFQKKYYLIMPLACFVMPVYVWGETWTNAFFVAAM  
FRYAFILNVTWLVNSAAHKWGDOPYDKSIKPSENLSVAMFALGEGFHNYHHTFPWDYKTAELGNKLNFTTTFI

NFFAKIGWAYDLKTVSDDIVKNRVKRTGDGSHHLWGWGDENQSKEIDAAIRINPKDD

>PocZ10\_

MPPNSEETVLCEKEDHEKLVAPQAATRKHELAIVPISLFTYWHVAGLYGLYLIFAEAKWQTVVFTLFTYNAGILGIT  
AGSHRLWAHKTYKAKRPLETLLMVHSLTSQNTVRHWARDHRFHKKYSDDADPHNATRGFFYSHVGWLLV  
KKHPEVLRRSKTIDMSDIYNNPVLRFQKNYGLPVITLFAYVLPALIPMYCWEETLNNAWHINLLRIIANLHASCLV  
NSAAHAFGNKPYDKHIAATQISTLSFITLGECHFNYHHVFPWDYRTAELGNNWLNMTTLFIDFFAWVGWAYDL  
KTASDGMVEARAKRTGDGTNLWGWGDEDLGREGGEEVFYGWGDRDMKDTSGVRVYSQE

>AvelZ/E11\_

MAPNAEDIETNMPETEENWETLVAPQAAPRKYQIVYKSLTFGYGHLAGLYGLYCFTSAKWQTIGLAILHAMA  
ILGITAGAHRLWTHRAYKATVPLQIILIFNSLSFQNSAFTWIRDHRLHHKYSDDGDPHNATRGFFYSHIGWLLV  
RKHPEVMKRGMRTEMMSDIYSNPIIMFQKNYAIPFIGTVCFVLPTIIPMYFWGETLNNAWHITVLRIFYSLNCIFLV  
NSAAHLYGKPYDKNILPAENKAASIASFGEAFHNYHHVFPWDYRASELGNITMNWTIYFIDFFAWIGWAYDLK  
TASDETIKSRIKRTGDGTDFSGQQIYAR

>OfurZ9\_

MPPQGAERDSFVLFESEDAKDPDVITHMAPQAEKRQTQIVWRNVAIFTYLHLGFLYGAYLMLTTVMWKTRLFCL  
ILYVCSGLGITAGAHRLWAHKSYPKAKPLRIILTLFNTLAFQDAVVDWARDHRMHKKYSETDADPHNATRGFFFS  
HVGWLLVRKHPQIKAKGHTIDMSDLRADPVLRQKKYMYLMPICFIMPSVVPALWGETVWNGYFTCAVFR  
YVAVLNGTWLVNSWAHLWGDKPYDRHINPVETKVVSVAAIGEGFHNYHHTFPWDYKAAELGNYTFNITKFFI  
DTMATIGWAYDLKTVSTDVIQKRITRTGDGSHPVWGWGDKNIPPEEDKKVTTVINPEKEE

>OfurZ/E11

MVPYATTADGHPEKDECDEFDNEIKSNSLPKLEILYFNVMTFTFLHLSALYGLYLGFTSVKWATIGLGIIFYFFAEIGIT  
AGAHRLWSHRSYKAKLPLEILLMVFNMAFQNTALSWARDHRVHHKCPDTNGDPHNANRGFFYSHVGWLM  
TKKSDEVIKQGKLCADVADLYSNPVLRFQKKYAVPFIGTLCFVLPTLIPMYFWGETLNNAWHFNMFYVINLNATF  
CVNSVVKHWGYPYDKNICPTQNVLLNLAVLGEAFHNYHHVFPWDYRAAELGNQKMNPTTLFIDFFAWIGW  
AYDLKTASKEMIKSRSERTGDGTDLWGHSAADKLK

>OnubZ/E14\_

MADIDATNPYDLQDKSEDDKPEDTEGELTIVGTDYSYTHRIIWPIVMVYVVMHIGAITGLLLVLGGNVKIASIIWA  
VFYSLVATEGAHMGAHRCFSHRAFKAKPLLVILLIMQTISGQHSTYIWCARDHRQHHRYSDDGDPHNSKRG  
MFYCHVGWLMTSRHLPLCKLRKTIDMSDLQDPLVMFQYRYFRSLFFTFGFLPVWVPMHFFQESFTNAVFLV  
CFFLRYVYALHVTYFINSLAHKYGTTPYDKTIQPVETWVFSLLSLGEGWHNYHHAYPWDYKAAEIGMPLNSTAS  
LIRLCASLGLAYDLKSVDPETLNKRIMNKGDTYEVKYLQEHVTAIGPLHPLNPSYRGTCPDPEIKLKVRMKP

>OnubZ/E11

MVPYATTADGHPEKDECDEFDNEIKSNSLPKLEILYFNVMTFTFLHLSALYGLYLGFTSVKWATIGLGIIFYFFAEIGIT  
AGAHRLWSHRSYKAKLPLEILLMVFNMAFQNTALSWARDHRVHHKCPDTNGDPHNANRGFFYSHVGWLM  
TKKSDEVIKQGKLCADVADLYSNPVLRFQKKYAVPFIGTLCFVLPTLIPMYFWGETLNNAWHFNMFYVINLNATF  
CVNSVVKHWGYPYDKNICPTQNVLLNLAVLGEAFHNYHHVFPWDYRAAELGNQKMNPTTLFIDFFAWIGW  
AYDLKTASKEMIKSRSERTGDGTDLWGHSAADKLK

>HassGATD

MAAMSSTSLLLANTMLSSKLQDHDDLRYAEPRKPNRDYEWQVVWRNVLAFVYLHVSAVYGLYMLTGKVK  
SYTILFGALFAIMSGMGVTAGARRLWAHRYSYKARWPLRVFLALMQTMAFQNHIEWVRDHRVHHKFTETDA  
DPHNAKRGGFFSHIGWLMVRKHKDVFEKGATVDMSDLQDPVIMFQKKTYLVMPILCFVIPAWIPVHFWDE  
NPWTSWYTAATRYTIALHFTWLVNSAAHIWGNRPYDKNIGATDNKMVAICAFGEGWHNYHHVFPWDYKA  
AELGDYSTNLSTALIDFAAKHGYAYDLKTVSADMIRKRVNRTGDGSHPWTKGKVEGDHYHPENPVWGWEDT  
DMTEEEKQFAEIVHRKTE

>HassZ9

MAPNISEDVNGVLFESDAATPDALSTPPVQKADNRPKQLVWRNILLFAYLHLAAQYGGYLFLSAKWQTDIFA  
YILYVISGLGITAGAHRLWAHKSYSYKAKWPLRVILVIFNTVAFQDAAMDWARDHRMHHKYSSETDADPHNATRGF  
FFSHIGWLLVRKHPDLKEKGKGLDMSDLLADPILRFQKKYYLILMPLACFVMPTVIPVYFWGETWTNAFFVAA  
MFRYAFILNVTWLVNSAAHKWGDOPYDKSIKPSENLSVAMFALGEGFHNYHHTFPWDYKTAELGNNKLNFTT  
TFINFFAKIGWAYDLKTVSDDIVKNRVKRTGDGSHHLWGWGDENQSKEEIDAAIRINPKDD

>HassZ9-2

MPPQGQTGGSWVLYETDAVNEDTDPVIVPPSAEKREWKIVWRNVILMGMLHIGGVYAYLFTTAMWRTC  
IFAVVLYICSLGITAGAHRLWAHKSYSYKARLPLRIMLTLENTLAFQDAVIDWARDHRMHHKYSSETDADPHNATR  
GFFFAHVGWLLVRKHPQIKAKGHTIDLSDLKSDPILRFQKKHYLFMPLVCFILPCYIPTLWGESLWNAYFVCSIFR  
YVYVLNVTWLVNSAAHLWGAKPYDKNINPVETRPVSLVVLGEGFHNYHHTFPWDYKTAELGDYSLNLTCLFIDT  
MAAIGWAYDLKTVSTDVIQKRVKRTGDGSHPVWGWDDHEVHQEDKKLAAIINPEKTE

>CparNF

MGLSEGAEVVPFKHKLKHNVIKFGYMHAAALYAYLCFTSAKWPTLLWAFLLLEFAKIGITAGAHRLWCHRSYK  
AKLPLEILLIFNSIAYMNTATYWVRDHRVHHKFADTDADPHNVNRGFWFSQIGWLFVRKHPDVIEKGKTVFM  
DDIHKNPILLRFQAKYAFFVIGLWAYVIPTVVPMPYFWGETLSNSWHICTMLRHVLTINQIFLVNSIGHRWGNRPY  
DKNIAVENIAVSLMSTGECFHNYHHVFPFDYKASELGMTKFNAAATMFINFFAWLGWAYDLKTIPDELIARSQ  
RTGDGRNLWGWGDVDQTEETKGVKYLTKNE

>CrosZ9

MAPNVTEENGVLFESEDAATPDALARTPVEQADDSPIRYVWRNIILFAYLHLAAIYGGYLFLSAKWQTDIFAYFL  
YVASGLGITAGAHRLWAHKSYSYKAKWPLRLILITFNTIAFQDSAIDWARDHRMHHKYSSETDADPHNATRGFFFSH  
IGWLLVRKHPELKRKGKGLDLSLYSDPILRFQKKYYMILMPLACFILPTVIPVYMWNETWSNAFFVAAALFRYTFI  
LNVTWLVNSAAHKWGDOPYDKSIKPSENMSVSLFAFGEGFHNYHHTFPWDYKTAELGNHRLNFTTKFINFFAK  
IGWAYDMKTVSQEIVQQRVKRTGDGSHHLWGWGDKDHAQEEINAAIRINPKDD

>CrosNF

MGLSEGAEVVPFKHKLKHNVIKFGYMHAAALYAYLCFTSAKWPTLLWAFLLLEFAKIGITAGAHRLWCHRSYK  
AKLPLEILLIFNSIAYMNTATYWVRDHRVHHKFADTDADPHNVNRGFWFSQIGWLFVRKHPDVIEKGKTVFM  
EDIHKNPILLRFQEKYAFFVIGLWAYVIPTVVPMPYFWGETLSNSWHICTMLRHVLTINQIFLVNSIGHRWGNRPY  
DKNIAVENLAVSLMSTGECFHNYHHVFPFDYKASELGMTKFNAAATMFINFFAWLGWAYDLKTIPDEMIIARS  
QRTGDGRNLWGWGDVDQTEETKGVKYLTKNE

>CrosZ/E11

MAPNVEDMESDLPESEEKLEKLVAPQAAPRKYQIIYTNLLTFGYWHIAGLYGLYLCFTSAKWQTIILALILNEMAIL  
GITAGAHRLWAHRSYKATVPLQIILIFNSLSFQNSAIHWIRDHRMHHKYSDDGDPHNASRGFFYSHVGWLLV  
KKHPEVKKRAKTIDMSDIYSNPILRFQKKYAIPIGIMICFVLPTIIPMYFWGETLSNAWHITMLRYVFSLSIFLVN  
SAAHLYGYRPYDKNILPAENKMTFIACLGENTHNYHHVFPWDYRASELGNIGMNWTAKFIDFFAWIGWAYDLK  
TASDENIKSRMKRTGDGTDVSGQKYSCESEVLQ

>CparZ9

MTTGTSLALAGTYFAAKNKKVDDDITPLTRISGKRRDYEWQIVWRNVLAFFVYLHVGLLYGYLILTGRVKLWTP  
VFAVTFTVLSALGVTAGAHRLWAHRAKARWPLRLILALLQTMAFQNHIEYWVRDHRVHHKFTETDADPHNA  
KRGFFFSHIGWLMVRKHKEVFEKGASIDMSDLEKDPIVMLQKKTLYLVMPILCFLLPSWIPVYFWGEDPWTSW  
YVASIWRYTMSLNFTWLVNSAAHIWGNKPFKNIGATDNLTVAICAIGEGWHNYHHVFPWDYKAAELGNRY  
TNISTAIIDLAAGYWAYDLKTVSTQMILNRVTRTGDGSHPSVSGDSKQLEETEHDHHHPENPVFGWTDADIS  
EEDRMLVEITHKIDEND

>SlitZ9-2

MPPQGQTGGSWVLYETDAVNVDTEAPVIVPPSAEKREWKIVWRNVILMGLLHIGGVYGYLFTTAMWRTSL  
FAVFLYICSGLGITAGAHRLWAHKSYPKARLPLRILLTLFNTLAFQDAVIDWARDHRMHHKYSDDADPHNATRGF  
FFSHVGWLLVRKHHPQIKAKGHTIDLSDLKNDPIILRFQKKHYLILMPLVCFILPCYIPTLWGESLWNAYFVCSIFRYV  
YVLNVTWLVNSAAHLWGAKPYDKNINPVETKPVSLVVLGEGFHNHYHHTFPWDYKTTELGDYPLNLTCLFIDFM  
AAIGWAYDLKTVSSDVIQKRVKRTGDGSHAVWGWDDHEVHQEDKELAAIINPDKTE

>TpitZ11-13

MAPNTRENETIYDEVEHKLEKLVPPQAGPWNKYIVYLNLLTFSYWLIAGAYGLYLCFTSAKWATIIFEFILFFFAEM  
GITAGAHRLWTHKSYKAKLPLEIFLMVLNSVAFQNTATDWVRDHRLLHHKYSDDADPHNAARGLFFSHVGWL  
LVRKHDEVKKRGKFTDMSDIYNNPVLFQKKYAIPIGAVCFILPTVIPMYFWGESLNNAWHICILRYAMNLNVT  
FSVNSLAHIWGNKPYDKDIKPAQNFVTLATFGEFHNHYHHVFPWDYRTSELGDNKFNFTTKFINFFERIGLAY  
DLKTVSDDVIAQRAKRTGDGTHLWDCADKNNNDVVQTKAQIDTLCTKHE

>LcapZ9

MPPNVTEANGVLFEENDVQTPDMGLEVAPVQKADERKIQLVWRNIIAFACHLAAVYGYLFFTSIAWQTDIFAY  
ILYVMSGLGITAGAHRLWAHKSYPKARWPLRLILVAFNTLAFQDSIDWARDHRMHHKYSDDADPHNATRGFF  
FSHIGWLLCRKHPELKRKGQGLDLSLYADPIIRFQKKYLLMPLACFVLPTIIPVYLWGESWKNFAFFVAAMFRY  
TFILNVTWLVNSAAHKWGGKPYDKNIQPAQNISVAIFALGEGFHNHYHHTFPWDYKTAELGNNRLNFTTSFINFF  
ASFGEWAYDLKTVSDEIIQQRVKRTGDGSHHLRGWGDQDIPAEAAQAALRINRKDD

>LcapNF

MAPNILGSSFLADTTLGKNVDDDHSSNFSASDNYSGKRRDYEWQIVWRNVFGFIYLTGMLYGYLIFTGQV  
KFFTFLFAVLFAILSAMGVTAGAHRLWAHRAKARWPLRLILAFQTMAFQNHLYEWVRDHRVHHKFTETDAD  
PHNAKRGFFFSHIGWLMIRKHKDVFEKGASIDMSDLEADPIVMFQKKTYLVVMPILCFVLPAYIPIVWWGEVP  
WTSWYVATILRFTVSLNFTWLVNSAAHIWGNRPYDENIGATDNKTVAILAFGEGWHNYHHVFPWDYKAAEL  
GNYSTNMSTAIIDYAAKHGWAYDLKTVSVMIRKRVARTGDGTHPSNDDTKKKLEEDHHHPDNPVWGWDD  
TDLKDEDRKFAEIAHPKEQ

>DpunZ/E11

MPPNTETFKKLKISEENLEQFPKLVAPQAAPRKYEIIYINVLTFSYWHLAAFYGIYLCFTSAKWTSVFFVFLYCTMG  
EVGVTAGSHRLWHSYKAKLPLQIILMTLSSIAFQNSVIDWVRNHRTHHKYSDDADPHNATRGFFFSHIGWL  
LVRKHSQTKLRGKTIDMSDIYNNSVLRFQKKYAIPIGTCFVLPVLIPMYCWNESFINAWHLNMLRYCLSLNFTF  
LVNSAAHLYGNKPYDKNILPAENKAVSFTLGEGFHNYHHTFPWDYRAAELGNNKLNLTTKFIDFFAWVGWAY  
DMKTVSDDMIRSRAKRTGDGSIWDDGKETIEMGDVSDAIVIKNE

>DpunZ/E9

MAPKEADVNGVLFESDATTTPDMALPTTPVQQADNYPKKLVWRNILLFAYLHLAALYGGYLFSAKWQTDIFAY  
ILYIMSGLGITAGAHRLWAHKSYPKAKWPLRLILVFNLTAFQDSIDWARDHRMHHKYSETDADPHNATRGFF  
SHIGWLLVRKHPELKKKGKGLDISDLYADPILRFQKKYLLMLPLGCFILPTVIPVYLWNETWSNAFLVAALFRYAVI  
LNVTLVNSAAHKWGDOPYDKSIKPSENLSVALFALGEGFHNYHHTFPWDYKTAELGNNRLNFTTTFINFFAKI  
GWAYDMKTVSDEIIQNRVKRTGDGSHHLWGWGDKHSKEEINAAIRINPKDD

>Dpun

MPPQGQAKSTWVLYETDVINDEAEVPTVPPTAERRKWQLVWRNILLFGFLHIGAVYGAYLFLKAMWKTCFA  
AIFLYLCSGLGITAGAHRLWAHKSYPKAKWPLRLILVFNLTAFQDSIDWARDHRMHHKYSETDADPHNATRGF  
FSHIGWLLVRKHPELKKKGKGLDISDLYADPILRFQKKYLLMLPLGCFILPTVIPVYLWNETWSNAFLVAALFRYAVI  
VWVLNVTLVNSAAHLWGNKPYDKHINPVEIKPVSLLVLEGGFHNYHHTFPWDYKTAELGDCTLNFSKIFIDF  
TSKVGWAYDLKTVSTDVIQKRVKRTGDGSHALWGEDDKDLPTTEKIQASIFNADTTS

>MbraZ11

MDQSVRTTILRGKEPTLTWLVLPQASPRKYQIVYPNLFTFGYWYIAGLYGLYLCFTSAKWQTMIFSFIL  
FVLAIEIGVTAGAHRLWAHKTAKLPLQIILMILNSIAFQNSAIDWVRDHRLLHHKFSDDADPHNATRGF  
FYSHVGWLLVRKHPEVKRRGKELDMSDIYNNPVLRFQKNYAIPFIGAVCFGLPTLIPVYCWGETWSTAWH  
ITMFRYVMNLNVTLVNSAAHIWGGKPYDKILPAQNIASVATCGEGFHNYHHVFPWDYRAAELGNNSL  
NVTTKFIDFFAWIGWAYDLKTVSQDMIKHLRALRTGDGSLNWGLEDKYVCEKNEGKDE

>AperZ11

MAPCTEKEDELITCEGSIEKLIAPQANKRKHQIVYMNLFYGYWYIAGLYGLYFFTSTKWSTIILNIFLIASGLGIT  
VGAHRLWAHCKFAKPLQIILMILNLTAFQNTAITWVRDHRMHHKFTDADPHNATRGFFFSHVGWLLVK  
KHPELMKRSHIDMSDIYGNPVLTFQKKYAFPLVATFTFILPTVPIYFWDESLNNAWHATVFRYAYNLNITFLVN  
SAAHMMWGYRYPYDKNIQPTQNIFTTLCTFGEGFHNYHHTFPWDYRAAELGNNYLNLTSTKVIDFFAWIGWAYDL  
KTVPADIVNSRAKRTGDGDLWGGNKHHTLDEKENREDDYVHKSFA

>Obru-TerDasat\_

MAPNTLKEDVMIVNEETSEKLVVGAAPRKYKVVWFIVAYATYVHIAAVYGLYLAVTSAMWPTIALTFINNLSILG  
LTAGVHRLWTHKSYKAKLPLQIFLMLCHTASNTFTSISWIRDHILHHKYDADPHNSTRGFFFSHIGWAMVK  
KQPEARAKGKSIDLSELYANPVLRFQKNVWLTLLVAYIIPSLVPLIWNFTVAYHMLLRVTVVNTFLLNSV  
AHMWGTRPYDETILPAQNKTVSFFTLEGGFHNYHHVFPHDYRTAELGDNFLNLTTKFIDFCAWMGQAYDRRY  
VPDDVIAARMKRTGETNEKNT

>OscFAD14

MADIDATNPYDLQDKSEDDKPEDTEGELTIVGTDYSYTHRIIWPIVMVYVVMHIGAITGLLLVLGGNVKIASIIWA  
VFYSLVATEGAHMGAHRCFSHRAFKAKPLLVILLIMQTSIGQHSTYIWCRRHQHRYSDTDGDPHNSKRG

MFYCHLGWLMTSRHPLCKLRKTIDMSDLQQDPLVMFYRYFRSLFFTFGFLLPVWVPMHFFQESFTNAV FV  
CFFLRYVYALHVTYFIISLAHKYGRPYDITI QPVETW FVSLTLGEGWHIYHHAYPWDYKAAGIWMPLNSTASLI  
RLCASLGLAYDLKSDVPETLNKRIMNKGDGT YE VKYLQEHVTAIGPLHPLNPSYRGTC PDPEIKLKVRMKP

>Asel

MAPNASDLNGVLFETDAGTPDMALPTPARQQADNRPKQYVWRNIILFAYLHLAALYGGYLF LFSAKWQTDIFA  
YILYVMSGLGITAGAHRLWAHKS YKAKWPLRVILVIFNTIAFQDSALDWARDHRMH HKYSETDADPHNATRGF  
FFSHIGWLLVRKH PDLKEKGKGLDLS DLYADPILRFQKKYLLMLPLACFVMPTLVPVYLWGESWGN AFFVAAM  
FRYAFILNVTWLVNSAAHKWGD KPYDKSIKPSENMSVALFALGEGFHNYHHTFPWDYKTAELGNNRLNFTTSFI  
NFFGKLGWAYDMKTVSEEIVQNRVKRTGDGTHYLGWGWGDSKMPQEDINAAITINPKDD

>Bmor-3

MEAKQNNLAPTLEEEAQFEKLIAPQASDRKHEIYANLITFAYGHISALYGLYLCFSSAKWATIIMAYVILIAAEVGV T  
AGAHRLWTHRAYKAKRPLQIILMVMNSFAFQNSAITWIRDHRMHHRYS DTDADPHNATRGFFYSHIGWLLVR  
KHPEVKRRGKTIDMSDIYSNPVLVFQKKYAIPIGAVCFVIPTLVPIYFWGETLTNAWHITLLRYIISLHVTF LVNSA  
AHLWGTRAYDKRIFPAQN LIVSLLAVGEGFHNYHHVFPWDYRTAELGNNYLNLT TKFIDFFAWLGWAYDLKSV P  
DSAVQSRAARTGDGTNSWGWPEEDANEDILKQTPPL

>Bmor

MAPNVKDANGVLFENDADTPDLGLSSTPVQQADNYPKKLVWRNIILFTYLHIAALYGGYLF LFHAKWQTDLFAY  
ILYVMSGLGITAGAHRLWAHKS YKAKWPLRVILIIENSLAFQDSALDWARDHRMH HKYSETDADPHNATRGFF  
SHIGWLLVRKHPELKRKGKGLDLS DLYADPILRFQKKYLLMPIACFILPTVIPVYFWNESWINAFFVATLFRYTFIL  
NVTWLVNSAAHKWGGKPYDKNIKPSENISVS VFALGEGFHNYHHTFPWDYKTAELGNNRLNFTTNFINFFAKI  
GWAYDLKTVSDEIKNRVNRTGDGSHYLGWGWGDKDLDEIKQAIRINPKDN

>Bmor-2

MPPQRKQEASWVLYEADANNLPEDAPPHVPPSAEKR PWKIVWRNVILFFILHVGGVYGGYLF LFKAMWRTSI  
FAIFLYLCSGLGITAGAHRLWAHKS YKARLPLRILLTIFNTIAFQDAVVDWARDHRMH HKYSETDADPHNATRGF  
FFSHIGWLLLRKHPEIKAKGHTVDVNELRNDPILRFQKKYYQILMPLACFIMPTYVPTLWGETVWNSFYVCAIFR  
YVYVLNITWLVNSAAH MWGSKPYDKNINPVETRPVSLVVLGEGFHNYHHTFPWDYKTAELGDYSLNLSKLFIDF  
MAKIDWAYDLKTVSTDVIQKRTKRTGDGSHPVWGYDVGEVATEDKTDTTNLVNSKVL

>Bmor-4

MAQNQTYNGLIVTEIEDSSLEHDSVKPSVVGPREYEIVYKNIFIHIYLVHVTMFYGLYLCCTTAKWPSVGFAYLCYV  
AATIGVTAGAHRLWSHKSYKARLPLQILLMVFLSLANQRATHWVRDHRVHHKYS DTDADPHNASRGFFYSHIG  
WLFVRKHPEVKKKGKGLIDLSDLFDNPALMFQHRYSKTFIPIVCFGLPTILPVILWDELLVAVNLTIMRYVINFHV  
FFLVNSVAHIWGNKPYDKTIKSAENNLVAFATLGEGYHNYHHVFPWDYRCTELGRTWLN YTKLFIDLCAKVGLA  
YDLKVVSDDVILRRVKRTGDRSHFIEN
